# Supplementary material for: Kaposi’s Sarcoma-Associated Herpesvirus-Encoded Viral IL-6 (vIL-6) Enhances Immunoglobulin Class-Switch Recombination
Source: PubMed Central journal article supplement (PMC6305588; doi:10.3389/fmicb.2018.03119), 2018-12-18
Supplement: Data_Sheet_1.pdf [file Data_Sheet_1.pdf]

## Supplementary Material

# Kaposi's Sarcoma-Associated Herpesvirus-Encoded Viral IL-6 (vIL-6) Enhances Immunoglobulin Class-Switch Recombination

Santas A. Rosario, Gabriel E. Santiago, Enrique A. Mesri\*, and Ramiro E. Verdun\*

\*Correspondence: Corresponding Author: emesri@med.miami.edu, rverdun@med.miami.edu

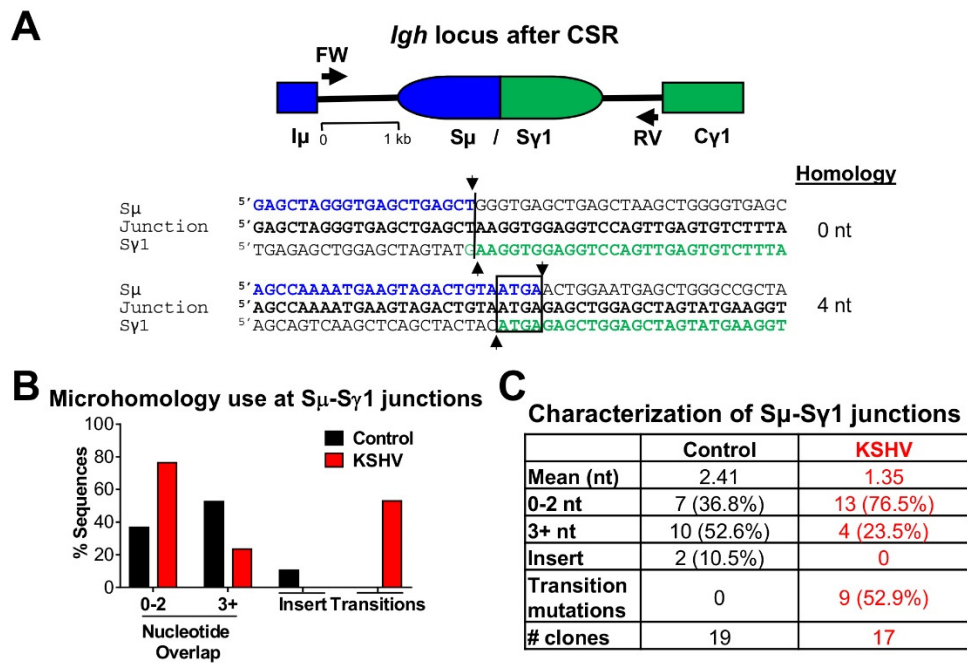

**Supplementary Figure 1.** KSHV-exposed splenocytes show a trend to decrease microhomology use at S $\mu$ -S $\gamma$ 1 junctions compared to control cells (A) Top, A schematic diagram of a S $\mu$ -S $\gamma$ 1 switch junction. Arrows show the position of the forward (FW) and reverse (RV) primers used for the amplification of the switch junctions. Bottom, Examples of alignment of S $\mu$ -S $\gamma$ 1 junctions (bold black) with S $\mu$  overlap (blue) and S $\gamma$ 1 overlap (green) germline sequences. Arrowheads indicate breakpoints in S $\mu$  and S $\gamma$ 1, where the vertical line shows no homology (0 nt overlap), and the box highlights homology (4 nt overlap) at the junction. (B) Percentage of S $\mu$ -S $\gamma$ 1 junctions with the indicated length of microhomology which is identified as the largest matches to the germline sequence in primary splenic B cells stimulated for switching with LPS/IL-4 (control) or LPS/IL-4/rKSHV.219 (KSHV). Graphs displaying the percentage of sequences exhibiting nucleotide overlap, insertions, and transition mutations from control and KSHV clones. (C) Table comparing microhomology use at S $\mu$ -S $\gamma$ 1 junctions in LPS/IL4-stimulated mouse splenic B cells cultured without rKSHV.219 (control) or with rKSHV.219 (KSHV). Two-tailed Fisher exact test was used for p-value test, p=0.079

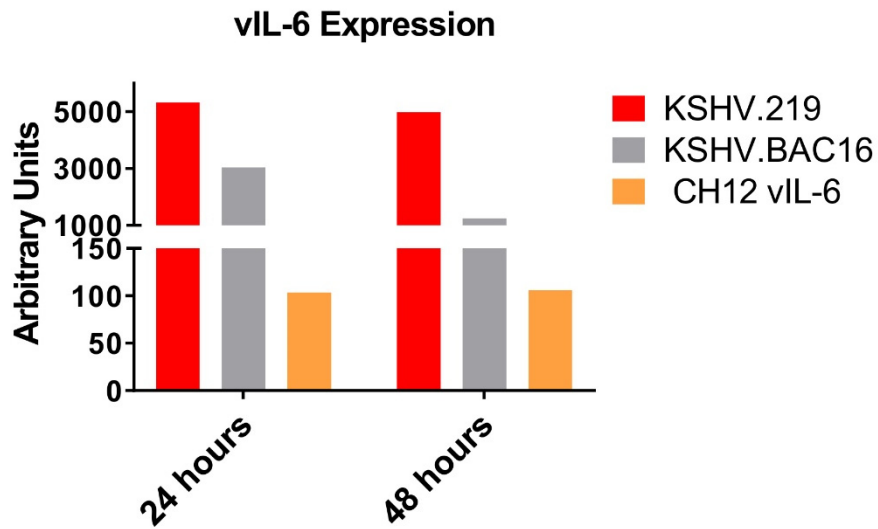

**Supplementary Figure 2.** Comparison of vIL-6 transcript levels in KSHV-infected and vIL-6 lentivirally transduced cells. RNA was harvested from rKSHV.219-infected, iSLK.219 (red), and KSHV BAC16-infected, iSLK.BAC16 (gray) cell lines lytically reactivated with doxycycline for 24 and 48-hours, and CH12F3-2 cells (orange) lentivirally transduced with vIL-6 for 24 and 48 hours. Graph displays values of fold-change of vIL-6 gene expression of KSHV-infected or vIL-6 transduced cells relative to uninfected control.

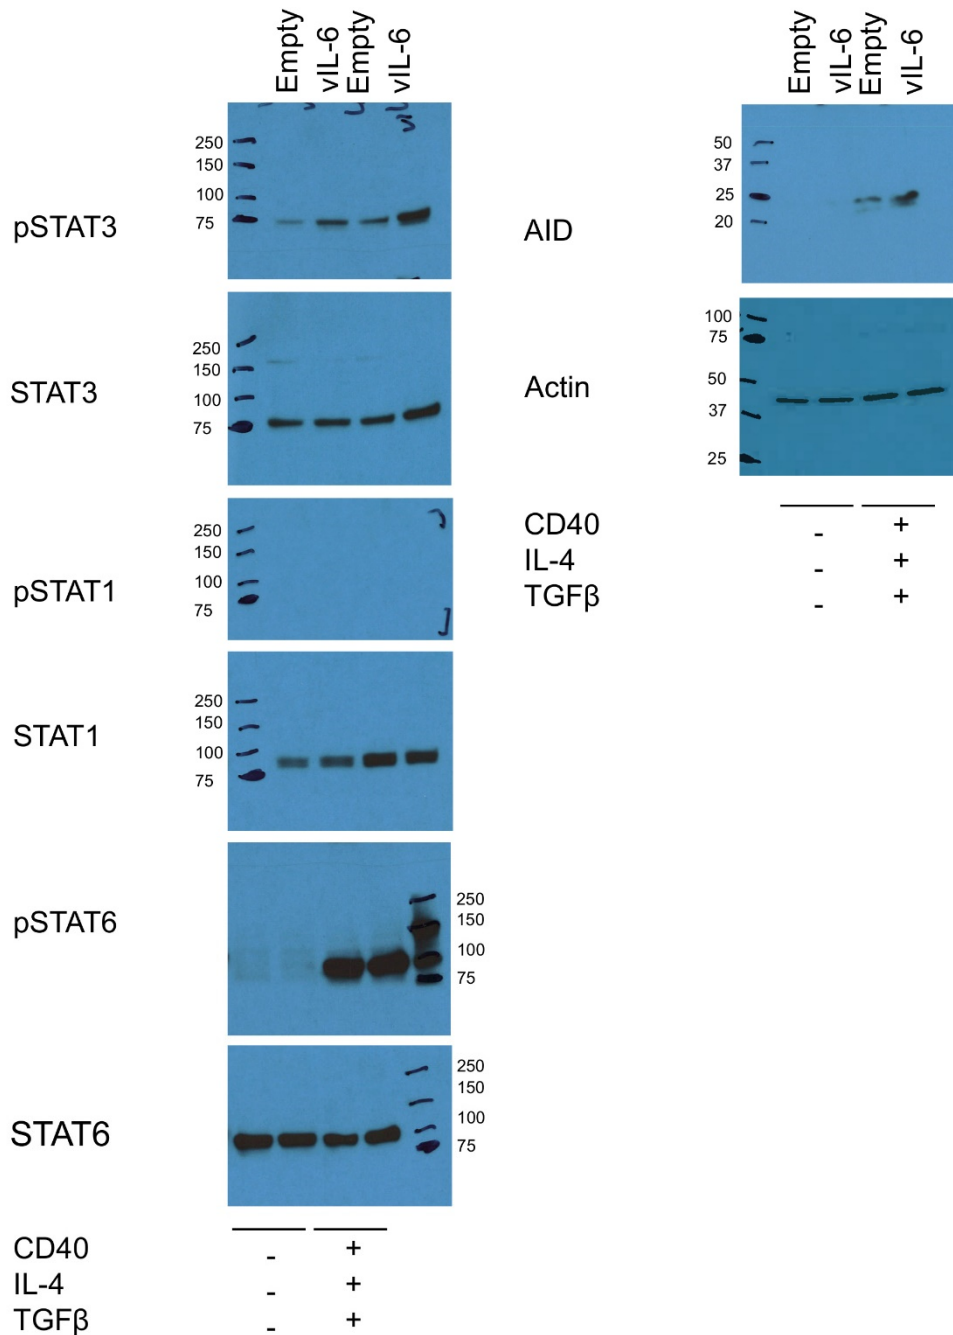

**Supplementary Figure 3.** Full image of the cropped western blot images shown in Figure 4 for CH12F3-2 cells transduced with the pSin plasmid (Empty) or with KSHV vIL-6 (vIL-6) and stimulated for 24 hours without (-) or with (+)  $\alpha$ CD40, IL-4, and TGF $\beta$  to induce CSR to IgA. Numbers to the left or the right of the blot indicate the ladder in kilodaltons. One membrane was cut into 2-3 sections (~250-75 kDa, 50-10 kDa or 100-25 kDa) prior to incubation with antibodies in order to probe for multiple proteins using a single membrane.
